# Supplementary material for: Bartonella DNA in heart tissues of bats in central and eastern Europe and a review of phylogenetic relations of bat-associated bartonellae
Source: Parasit Vectors. 2018 Aug 29;11:489. doi: 10.1186/s13071-018-3070-7 (PMC6116555; doi:10.1186/s13071-018-3070-7)
Supplement: Supplementary file 2 — Table S2. Detailed information regarding the sequences used in the phylogenetic analysis. (XLSX 29 kb) [file 13071_2018_3070_MOESM2_ESM.xlsx]

## Sheet: Sheet1
Additional file 2: Table S2. Detailed information regarding the sequences used in the phylogenetic analysis
Bat family	Bat species	Samples tested	No of samples	Method of detection	Gene targeted	Prevalence (%)	Country	GenBank Acccession Number	No of sequences/isolates	No of unique genetic variants detected	Reference
	Total	Heart	60	nPCR	gltA	8.3	UK	AJ871611-AJ876615	5	5	Concannon et al., 2005
Vespertilionidae	Pipistrellus sp.	Heart	36	nPCR	gltA	5.55	UK	AJ871611; AJ871614	2	5	Concannon et al., 2005
Vespertilionidae	Barbastella barbastellus	Heart	1	nPCR	gltA	-	UK	-	-	-	Concannon et al., 2005
Vespertilionidae	Plecotus auritus	Heart	15	nPCR	gltA	-	UK	-	-	-	Concannon et al., 2005
Rhinolophidae	Rhinolophus hipposideros	Heart	3	nPCR	gltA	-	UK	-	-	-	Concannon et al., 2005
Vespertilionidae	Myotis mystacinus	Heart	2	nPCR	gltA	50	UK	AJ871612	1	1	Concannon et al., 2005
Vespertilionidae	Myotis daubentonii	Heart	1	nPCR	gltA	100	UK	AJ871613	1	1	Concannon et al., 2005
Vespertilionidae	Nyctalus noctula	Heart	1	nPCR	gltA	100	UK	AJ871615	1	1	Concannon et al., 2005
Vespertilionidae	Myotis nattereri	Heart	1	nPCR	gltA	-	UK	-	-	-	Concannon et al., 2005
	Total	Heart	26	cPCR	gltA	-	Spain	KY041981	1	1	Stuckey et al., 2017
		Heart	109	cPCR	gltA	-	France	KY041982-KY041992	11	11	Stuckey et al., 2017
		Heart	135	cPCR	gltA	8.9	France, Spain	-	12	12	Stuckey et al., 2017
Vespertilionidae	Myotis daubentonii	Heart	3	cPCR	gltA	66.6	France	KY041985; KY041989	2	2	Stuckey et al., 2017
Vespertilionidae	Myotis mystacinus	Heart	4	cPCR	gltA	25	France	KY041986	1	1	Stuckey et al., 2017
Vespertilionidae	Nyctalus noctula	Heart	15	cPCR	gltA	13.3	France	KY041991; KY041992	2	2	Stuckey et al., 2017
Vespertilionidae	Pipistrellus nathusii	Heart	24	cPCR	gltA	25	France	KY041982-KY041984; KY041987; KY041988; KY041990	6	6	Stuckey et al., 2017
	Not determined	Heart	1	cPCR	gltA	100	Spain	KY041981	1	1	Stuckey et al., 2017
	Total		148	cPCR	gltA	-	Nigeria	KF4188806-KF418809	4	4	Kamani et al., 2014
			148	cPCR	gltA	-	Nigeria	KF418810-KF418812	2	2	Kamani et al., 2014
			24	cPCR	gltA	-	Nigeria		-	-	Kamani et al., 2014
Pteropodidae	Eidolon helvum	Blood	79	cPCR	gltA	11.39	Nigeria	-	-	-	Kamani et al., 2014
		Blood culture	79	cPCR	gltA	15.2	Nigeria	KF418811	1	1	Kamani et al., 2014
Pteropodidae	Epomophorus sp.	Blood	30	cPCR	gltA	10	Nigeria	KF418806	2	2	Kamani et al., 2014
		Blood culture	30	cPCR	gltA	10	Nigeria	KF418808	-	-	Kamani et al., 2014
Pteropodidae	Micropteropus sp.	Blood	11	cPCR	gltA	9.09	Nigeria	-	-	-	Kamani et al., 2014
		Blood culture	11	cPCR	gltA	45.5	Nigeria	KF418812	1	1	Kamani et al., 2014
Molossidae	Chaerephon nigeriae	Blood	16	cPCR	gltA	0	Nigeria	-	-	-	Kamani et al., 2014
		Blood culture	16	cPCR	gltA	0	Nigeria	-	-	-	Kamani et al., 2014
Rhinolophidae	Rhinolophus sp.	Blood	12	cPCR	gltA	8.33	Nigeria	KF418807; KF418809	2	2	Kamani et al., 2014
		Blood culture	12	cPCR	gltA	25	Nigeria	KF418810	1	1	Kamani et al., 2014
			24	cPCR	gltA	29.16	Nigeria	-	-	-	Kamani et al., 2014
	Total	Blood culture	51	cPCR	gltA	18	Puerto Rico	KJ530741-KJ530746	6	6	Olival et al., 2015
Phyllostomidae	Artibeus jamaicensis	Blood culture	4	cPCR	gltA	25	Puerto Rico	KJ530741	1	1	Olival et al., 2015
Phyllostomidae	Brachyphylla cavernarum	Blood culture	1	cPCR	gltA	100	Puerto Rico	KJ530742	1	1	Olival et al., 2015
Phyllostomidae	Erophylla sezekorni	Blood culture	14	cPCR	gltA	0	Puerto Rico	-	-	-	Olival et al., 2015
Phyllostomidae	Monophyllus redmani	Blood culture	9	cPCR	gltA	78	Puerto Rico	KJ530743-KJ530746	-	2	Olival et al., 2015
Mormoopidae	Mormoops blainvillei	Blood culture	19	cPCR	gltA	-	Puerto Rico	-	-	-	Olival et al., 2015
Mormoopidae	Pteronotus quadridens	Blood culture	4	cPCR	gltA	-	Puerto Rico	-	-	-	Olival et al., 2015
	Total	Blood culture	118	cPCR	gltA	33.1	Guatemala	HM597187-HM597207	41	21	Bai et al., 2011
Phyllostomidae	Artibeus jamaicensis	Blood culture	13	cPCR	gltA	-	Guatemala	-	-	-	Bai et al., 2011
Phyllostomidae	Artibeus lituratus	Blood culture	3	cPCR	gltA	-	Guatemala	-	-	-	Bai et al., 2011
Phyllostomidae	Artibeus toltecus	Blood culture	1	cPCR	gltA	100	Guatemala	HM597197	1	1	Bai et al., 2011
Phyllostomidae	Carollia castanea	Blood culture	1	cPCR	gltA	-	Guatemala	-	-	-	Bai et al., 2011
Phyllostomidae	Carollia perspicillata	Blood culture	14	cPCR	gltA	28.6	Guatemala	HM597199	1	2	Bai et al., 2011
Phyllostomidae	Desmodus rotundus	Blood culture	31	cPCR	gltA	48.4	Guatemala	HM597187-HM597192; HM597195; HM597196	8	8	Bai et al., 2011
Phyllostomidae	Glossophaga soricina	Blood culture	15	cPCR	gltA	13.3	Guatemala	HM597202	1	1	Bai et al., 2011
Phyllostomidae	Micronycteris microtis	Blood culture	3	cPCR	gltA	-	Guatemala	HM597207	1	1	Bai et al., 2011
Vespertilionidae	Myotis elegans	Blood culture	2	cPCR	gltA	-	Guatemala	-	-	-	Bai et al., 2011
Vespertilionidae	Myotis nigricans	Blood culture	1	cPCR	gltA	-	Guatemala	-	-	-	Bai et al., 2011
Phyllostomidae	Phyllostomus discolor	Blood culture	9	cPCR	gltA	88.9	Guatemala	HM597198; HM597200; HM597201; HM597204	4	4	Bai et al., 2011
Phyllostomidae	Platyrrhinus helleri	Blood culture	1	cPCR	gltA	-	Guatemala	-	-	-	Bai et al., 2011
Mormoopidae	Pteronotus davyi	Blood culture	10	cPCR	gltA	70	Guatemala	HM597193; HM597194; HM597203; HM597205	4	4	Bai et al., 2011
Phyllostomidae	Sturnira lilium	Blood culture	12	cPCR	gltA	8.3	Guatemala	HM597206	1	1	Bai et al., 2011
Phyllostomidae	Sturnira ludovici	Blood culture	2	cPCR	gltA	-	Guatemala	-	-	-	Bai et al., 2011
	Total	Blood culture	331	cPCR	gltA	30.2	Kenya	HM363764-HM363768; HM545136-HM545141	58	10	Kosoy et al., 2010
Pteropodidae	Eidolon helvum	Blood culture	88	cPCR	gltA	26.1	Kenya	HM363765-HM363767	3	3	Kosoy et al., 2010
Pteropodidae	Rousettus aegyptiacus	Blood culture	105	cPCR	gltA	21	Kenya	HM363764	1	1	Kosoy et al., 2010
Emballonuridae	Coleura afra	Blood culture	9	cPCR	gltA	44.4	Kenya	HM545136	1	1	Kosoy et al., 2010
Hipposideridae	Triaenops persicus	Blood culture	8	cPCR	gltA	87.5	Kenya	HM545138	1	1	Kosoy et al., 2010
Hipposideridae	Hipposideros commersoni	Blood culture	4	cPCR	gltA	25	Kenya	HM545137	1	1	Kosoy et al., 2010
Miniopteridae	Miniopterus sp.	Blood culture	87	cPCR	gltA	56.3	Kenya	HM545139-HM545141	3	3	Kosoy et al., 2010
Pteropodidae	Epomophorus sp.	Blood culture	23	cPCR	gltA	-	Kenya	-	-	-	Kosoy et al., 2010
Rhinolophidae	Rhinolophus sp.	Blood culture	6	cPCR	gltA	-	Kenya	-	-	-	Kosoy et al., 2010
Molossidae	Charerephon sp.	Blood culture	1	cPCR	gltA	-	Kenya	-	-	-	Kosoy et al., 2010
	Total	Blood	76	cPCR	gltA	27.63	Madagascar	KP010191-KP010193	3	3	Brook et al., 2014
		Ectoparasites	25	cPCR	gltA	-	Madagascar	KP010150-KP010156; KP010158; KP010159; KP010160-KP010164	13	13	Brook et al., 2014
Pteropodidae	Eidolon dupreanum	Blood	47	cPCR	gltA	44.68	Madagascar	KP010191-KP010193	3	3	Brook et al., 2014
Pteropodidae	Pteroptus rufus	Blood	29	cPCR	gltA	-	Madagascar	-	-	-	Brook et al., 2014
Pteropodidae	Eidolon dupreanum	Cyclopodia dubia	19	cPCR	gltA	89.47	Madagascar	KP010151-KP010156; KP010158; KP010159; KP010160-KP010164	13	13	Brook et al., 2014
Pteropodidae	Eidolon dupreanum	Cyclopodia sp.	-	cPCR	gltA	-	Madagascar	KP010150	1	1	Brook et al., 2014
Pteropodidae	Eidolon dupreanum	Thaumapsylla sp.	6	cPCR	gltA	-	Madagascar	-	-	-	Brook et al., 2014
	Total	Blood	63	cPCR	gltA	33.3	Costa Rica	KJ816665-KJ816692	34	25	Judson et al., 2015
		Bat flies	55	cPCR	gltA	52.7	Costa Rica	-	15	15	Judson et al., 2015
Phyllostomidae	Micronycteris microtis	Blood	1	cPCR	gltA	100	Costa Rica	KJ816681	1	1	Judson et al., 2015
Vespertilionidae	Myotis keaysi	Blood	4	cPCR	gltA	75	Costa Rica	KJ816667; KJ816669; KJ816676; KJ816689	4	4	Judson et al., 2015
Phyllostomidae	Carollia sowelli	Blood	3	cPCR	gltA	66.6	Costa Rica	KJ816690	1	1	Judson et al., 2015
Phyllostomidae	Artibeus lituratus	Blood	6	cPCR	gltA	50	Costa Rica	KJ816675; KJ816680; KJ816685; KJ816687	4	4	Judson et al., 2015
Phyllostomidae	Anoura goeffroyi	Blood	4	cPCR	gltA	50	Costa Rica	KJ816666; KJ816688	2	2	Judson et al., 2015
Phyllostomidae	Artibeus jamaicensis	Blood	2	cPCR	gltA	50	Costa Rica	KJ816682	1	1	Judson et al., 2015
Phyllostomidae	Platyrrhinus vittatus	Blood	2	cPCR	gltA	50	Costa Rica	KJ816684	1	1	Judson et al., 2015
Phyllostomidae	Vampyressa thyone	Blood	2	cPCR	gltA	50	Costa Rica	KJ816672	1	1	Judson et al., 2015
Phyllostomidae	Carollia perspicillata	Blood	6	cPCR	gltA	33.3	Costa Rica	KJ816691	1	1	Judson et al., 2015
Phyllostomidae	Sturnira mordax	Blood	3	cPCR	gltA	33.3	Costa Rica	-	-	-	Judson et al., 2015
Phyllostomidae	Phyllostomus discolor	Blood	3	cPCR	gltA	33.3	Costa Rica	KJ816665	1	1	Judson et al., 2015
Phyllostomidae	Sturnira lilium	Blood	7	cPCR	gltA	28.6	Costa Rica	KJ816670; KJ816671; KJ816673; KJ816674; KJ816679	5	5	Judson et al., 2015
Phyllostomidae	Carollia castanea	Blood	6	cPCR	gltA	16.6	Costa Rica	KJ816683; KJ816686	2	2	Judson et al., 2015
Phyllostomidae	Glossophaga soricina	Blood	1	cPCR	gltA	-	Costa Rica	KJ816678	1	1	Judson et al., 2015
Phyllostomidae	Uroderma bilobatum	Blood	1	cPCR	gltA	-	Costa Rica	KJ816677; KJ816692	2	2	Judson et al., 2015
Phyllostomidae	Desmodus rotundus	Blood	1	cPCR	gltA	-	Costa Rica	-	-	-	Judson et al., 2015
Phyllostomidae	Enchisthenes hartii	Blood	1	cPCR	gltA	-	Costa Rica	-	-	-	Judson et al., 2015
Vespertilionidae	Eptesicus brasiliensis	Blood	1	cPCR	gltA	-	Costa Rica	-	-	-	Judson et al., 2015
Phyllostomidae	Hylonycteris underwoodi	Blood	2	cPCR	gltA	-	Costa Rica	-	-	-	Judson et al., 2015
Phyllostomidae	Lonchophylla robusta	Blood	3	cPCR	gltA	-	Costa Rica	-	-	-	Judson et al., 2015
Phyllostomidae	Phyllostomus hastatus	Blood	1	cPCR	gltA	-	Costa Rica	-	-	-	Judson et al., 2015
Mormoopidae	Pteronotus parnellii	Blood	3	cPCR	gltA	-	Costa Rica	-	-	-	Judson et al., 2015
		Paratrichobius longicrus	4	cPCR	gltA	100	Costa Rica	-	-	-	Judson et al., 2015
		Aspidoptera delatorrei	3	cPCR	gltA	100	Costa Rica	-	-	-	Judson et al., 2015
		Paratrichobius dunnei	2	cPCR	gltA	100	Costa Rica	-	-	-	Judson et al., 2015
		Trichobius keenani	1	cPCR	gltA	100	Costa Rica	-	-	-	Judson et al., 2015
		Basilia spp.	1	cPCR	gltA	100	Costa Rica	-	-	-	Judson et al., 2015
		Aspidoptera phyllostomatis	1	cPCR	gltA	100	Costa Rica	-	-	-	Judson et al., 2015
		Neotrichobius spp.	1	cPCR	gltA	100	Costa Rica	-	-	-	Judson et al., 2015
		Trichobius costalimai	1	cPCR	gltA	100	Costa Rica	-	-	-	Judson et al., 2015
		Trichobius dugesii	1	cPCR	gltA	100	Costa Rica	-	-	-	Judson et al., 2015
		Megistopoda proxima	8	cPCR	gltA	50	Costa Rica	-	-	-	Judson et al., 2015
		Anatrichobius scorzai	4	cPCR	gltA	50	Costa Rica	-	-	-	Judson et al., 2015
		Strebla guajiro	2	cPCR	gltA	50	Costa Rica	-	-	-	Judson et al., 2015
		Trichobius spp.	2	cPCR	gltA	50	Costa Rica	-	-	-	Judson et al., 2015
		Anastrebla modestini	2	cPCR	gltA	50	Costa Rica	-	-	-	Judson et al., 2015
		Trichobius joblingi	11	cPCR	gltA	45.4	Costa Rica	-	-	-	Judson et al., 2015
		Exastinion clovisi	1	cPCR	gltA	-	Costa Rica	-	-	-	Judson et al., 2015
		Trichobius new spp.	1	cPCR	gltA	-	Costa Rica	-	-	-	Judson et al., 2015
		Trichobioides perspicillatus	1	cPCR	gltA	-	Costa Rica	-	-	-	Judson et al., 2015
		Strebla new spp.	1	cPCR	gltA	-	Costa Rica	-	-	-	Judson et al., 2015
		Trichobius lonchophyllae	1	cPCR	gltA	-	Costa Rica	-	-	-	Judson et al., 2015
		Nycterophilia parnelli	2	cPCR	gltA	-	Costa Rica	-	-	-	Judson et al., 2015
		Trichobius caecus	1	cPCR	gltA	-	Costa Rica	-	-	-	Judson et al., 2015
		Trichobius parasiticus	3	cPCR	gltA	-	Costa Rica	-	-	-	Judson et al., 2015
	Total	Blood	384	cPCR	gltA	3.38	South Africa and Swaziland	KR997972-KR997983			Dietrich et al., 2016
		Bat flies	14	cPCR	gltA	-	South Africa and Swaziland	KR997984-KR997989	6	6	Dietrich et al., 2016
Miniopteridae	Miniopterus natalensis	-	25	cPCR	gltA	28	South Africa	KR997972; KR997973; KR997975; KR997976; KR997980; KR997981; KR997983	6	6	Dietrich et al., 2016
Nycteridae	Nycteris thebaica	-	49	cPCR	gltA	8.16	Swaziland	KR997974; KR997978; KR997979; KR997982	4	4	Dietrich et al., 2016
Pteropodidae	Epomophorus wahlbergi	-	82	cPCR	gltA	3.65	South Africa	KR997977	1	1	Dietrich et al., 2016
Pteropodidae	Rousettus aegyptiacus	-	7	cPCR	gltA	14.28	South Africa	KR997990	1	1	Dietrich et al., 2016
Pteropodidae	Epomophorus cryturus	-	5	cPCR	gltA	-	South Africa	-	-	-	Dietrich et al., 2016
Vespertilionidae	Scotophilus sp.	-	26	cPCR	gltA	-	South Africa	-	-	-	Dietrich et al., 2016
Vespertilionidae	Scotophilus dinganii	-	18	cPCR	gltA	-	South Africa	-	-	-	Dietrich et al., 2016
Vespertilionidae	Scotophilus leucogaster	-	6	cPCR	gltA	-	South Africa	-	-	-	Dietrich et al., 2016
Vespertilionidae	Scotophilus nigrita	-	1	cPCR	gltA	-	South Africa	-	-	-	Dietrich et al., 2016
Vespertilionidae	Nycticeinops schlieffeni	-	22	cPCR	gltA	-	South Africa	-	-	-	Dietrich et al., 2016
Vespertilionidae	Neoromicia nana	-	23	cPCR	gltA	-	South Africa	-	-	-	Dietrich et al., 2016
Vespertilionidae	Neoromicia cf. helios	-	5	cPCR	gltA	-	South Africa	-	-	-	Dietrich et al., 2016
Vespertilionidae	Neoromicia capensis	-	2	cPCR	gltA	-	South Africa	-	-	-	Dietrich et al., 2016
Vespertilionidae	Neoromicia rueppellii	-	1	cPCR	gltA	-	South Africa	-	-	-	Dietrich et al., 2016
Vespertilionidae	Neoromicia zuluensis	-	2	cPCR	gltA	-	South Africa	-	-	-	Dietrich et al., 2016
Vespertilionidae	Glauconycteris variegata	-	3	cPCR	gltA	-	South Africa	-	-	-	Dietrich et al., 2016
Vespertilionidae	Pipistrellus hesperidus	-	6	cPCR	gltA	-	South Africa	-	-	-	Dietrich et al., 2016
Vespertilionidae	Pipistrellus rusticus	-	6	cPCR	gltA	-	South Africa	-	-	-	Dietrich et al., 2016
Vespertilionidae	Myotis tricolor	-	1	cPCR	gltA	-	South Africa	-	-	-	Dietrich et al., 2016
Molossidae	Tadarida sp.	-	5	cPCR	gltA	-	South Africa	-	-	-	Dietrich et al., 2016
Molossidae	Charerephon sp.	-	5	cPCR	gltA	-	South Africa	-	-	-	Dietrich et al., 2016
Molossidae	Mops sp.	-	5	cPCR	gltA	-	South Africa	-	-	-	Dietrich et al., 2016
Molossidae	Mops condylurus	-	12	cPCR	gltA	-	South Africa	-	-	-	Dietrich et al., 2016
Molossidae	Chaerephon pumilus	-	4	cPCR	gltA	-	South Africa	-	-	-	Dietrich et al., 2016
Molossidae	Chaerephon ansorgei	-	2	cPCR	gltA	-	South Africa	-	-	-	Dietrich et al., 2016
Rhinolophidae	Rhinolophus fumigatus	-	2	cPCR	gltA	-	South Africa	-	-	-	Dietrich et al., 2016
Rhinolophidae	Rhinolophus landeri	-	1	cPCR	gltA	-	South Africa	-	-	-	Dietrich et al., 2016
Hipposideridae	Hipposideros caffer	-	4	cPCR	gltA	-	South Africa	-	-	-	Dietrich et al., 2016
Emballonuridae	Taphozous mauritianus	-	4	cPCR	gltA	-	South Africa	-	-	-	Dietrich et al., 2016
		Eucampsipoda sp.	-	cPCR	gltA	-	South Africa	KR997984-KR997989	6	6	Dietrich et al., 2016
	Total		-	cPCR	gltA	-	French Guiana	KP715473; KP715477	2	2	Davoust et al., 2016
	Noctilio albiventris	Blood culture	22	cPCR	gltA		French Guiana	KP715473	1	1	Davoust et al., 2016
	Pteronotus parnellii	Blood culture	14	cPCR	gltA	-	French Guiana	KP715477	1	1	Davoust et al., 2016
	Total	Blood	60	cPCR	gltA	35	Vietnam	KP100340-KP100360	21	21	Anh et al., 2015
Pteropodidae	Cynopterus sphinx	Blood	14	cPCR	gltA	-	Vietnam	-	-	-	Anh et al., 2015
Hipposideridae	Hipposideros armiger	Blood	6	cPCR	gltA	33.3	Vietnam	KP100356; KP100357	2	2	Anh et al., 2015
Hipposideridae	Hipposiderus larvatus	Blood	5	cPCR	gltA	60	Vietnam	KP100354; KP100355; KP100360	3	3	Anh et al., 2015
Pteropodidae	Megaerops niphanae	Blood	2	cPCR	gltA	50	Vietnam	KP100352	1	1	Anh et al., 2015
Pteropodidae	Megaderma spasma	Blood	2	cPCR	gltA	50	Vietnam	KP100341	1	1	Anh et al., 2015
Pteropodidae	Megaderma lyra	Blood	1	cPCR	gltA	100	Vietnam	KP100359	1	1	Anh et al., 2015
Rhinolophidae	Rhinolophus acuminatus	Blood	17	cPCR	gltA	52.9	Vietnam	KP100340; KP100342; KP100345-KP100351	9	9	Anh et al., 2015
Rhinolophidae	Rhinolophus chaseni	Blood	5	cPCR	gltA	40	Vietnam	KP100353; KP100358	2	2	Anh et al., 2015
Rhinolophidae	Rhinolophus sinicus	Blood	7	cPCR	gltA	28.6	Vietnam	KP100343; KP100344	2	2	Anh et al., 2015
Rhinolophidae	Rhinolophus luctus	Blood	1	cPCR	gltA	-	Vietnam	-	-	-	Han et al., 2016
	Total	Blood	107	cPCR	gltA	25.2	China	KX655808; KX655811-KX655816 ;KX655818-KX655825; KX655827-KX655830; KX655832-KX655836; KX655838; KX655839; KX655841-KX655843	29	29	Han et al., 2016
Rhinolophidae	Rhinolophus ferrumequinum	Blood	3	cPCR	gltA	33.3	China	KX655838	1	1	Han et al., 2016
Rhinolophidae	Rhinolophus pusillus	Blood	10	cPCR	gltA	20	China	KX655818; KX655824	2	2	Han et al., 2016
Vespertilionidae	Myotis fimbriatus	Blood	10	cPCR	gltA	56.3	China	KX655808; KX655813; KX655821; KX655822; KX655827; KX655829; KX655832; KX655834; KX655839; KX655843	10	10	Han et al., 2016
Vespertilionidae	Myotis ricketti	Blood	5	cPCR	gltA	20	China	KX655811	1	1	Han et al., 2016
Vespertilionidae	Myotis pequinius	Blood	58	cPCR	gltA	24.1	China	KX655812; KX655814; KX655815; KX655816; KX655819; KX655820; KX655823; KX655825; KX655828; KX655830; KX655833; KX655835; KX655836; KX655841; KX655842	15	15	Han et al., 2016
Vespertilionidae	Eptesicus serotinus	Blood	15	cPCR	gltA	-	China	-	-	-	Han et al., 2016
	Total	Blood culture	112	cPCR	gltA	24.1	Peru	JQ071378-JQ071390	13	13	Bai et al., 2012
Phyllostomidae	Dermanura glaucus	Blood culture	1	cPCR	gltA	-	Peru	-	-	-	Bai et al., 2012
Phyllostomidae	Artibeus lituratus	Blood culture	3	cPCR	gltA	-	Peru	-	-	-	Bai et al., 2012
Phyllostomidae	Artibeus obscurus	Blood culture	10	cPCR	gltA	10	Peru	JQ071380	1	1	Bai et al., 2012
Phyllostomidae	Artibeus planirostris	Blood culture	16	cPCR	gltA	12.5	Peru	JQ071381; JQ071382	2	2	Bai et al., 2012
Phyllostomidae	Carollia brevicauda	Blood culture	2	cPCR	gltA	100	Peru	-	-	-	Bai et al., 2012
Phyllostomidae	Carollia castanea	Blood culture	2	cPCR	gltA	-	Peru	-	-	-	Bai et al., 2012
Phyllostomidae	Carollia perspicillata	Blood culture	29	cPCR	gltA	13.8	Peru	JQ071384-JQ071386	3	3	Bai et al., 2012
Phyllostomidae	Desmodus rotundus	Blood culture	18	cPCR	gltA	55.6	Peru	JQ071378; JQ071379	2	2	Bai et al., 2012
Phyllostomidae	Diphylla ecaudata	Blood culture	1	cPCR	gltA	-	Peru	-	-	-	Bai et al., 2012
Phyllostomidae	Glossophaga soricina	Blood culture	2	cPCR	gltA	50	Peru	JQ071383	1	1	Bai et al., 2012
Molossidae	Molossus molossus	Blood culture	10	cPCR	gltA	-	Peru	-	-	-	Bai et al., 2012
Vespertilionidae	Myotis sp.	Blood culture	6	cPCR	gltA	16.7	Peru	JQ071390	1	1	Bai et al., 2012
Phyllostomidae	Phyllostomus discolor	Blood culture	2	cPCR	gltA	100	Peru	JQ071387	1	1	Bai et al., 2012
Phyllostomidae	Phyllostomus hastatus	Blood culture	2	cPCR	gltA	50	Peru	JQ071388	1	1	Bai et al., 2012
Phyllostomidae	Platyrrhinus recifinus	Blood culture	1	cPCR	gltA	-	Peru	-	-	-	Bai et al., 2012
Phyllostomidae	Rhinophylla pumilio	Blood culture	2	cPCR	gltA	-	Peru	-	-	-	Bai et al., 2012
Phyllostomidae	Sturnira lilium	Blood culture	1	cPCR	gltA	100	Peru	-	-	-	Bai et al., 2012
Phyllostomidae	Uroderma bilobatum	Blood culture	1	cPCR	gltA	-	Peru	-	-	-	Bai et al., 2012
Phyllostomidae	Vampyriscus bidens	Blood culture	3	cPCR	gltA	66.7	Peru	JQ071389	1	1	Bai et al., 2012
	Total	Blood culture	212	cPCR	gltA	49.5	Georgia	KX300107; KX300112; KX300117; KX300123; KX300127; KX300131; KX300136; KX300140; KX300145; KX300149; KX300154; KX300158; KX300165; KX300169; KX300179; KX300183; KX300192; KX300195; KX300200	21	21	Urushadze et al., 2017
Vespertilionidae	Eptesicus serotinus	Blood culture	20	cPCR	gltA	20	Georgia	KX300200	1	1	Urushadze et al., 2017
Miniopteridae	Miniopterus schreibersii	Blood culture	27	cPCR	gltA	88.9	Georgia	KX300183; KX300192; KX300195; KY679154	4	4	Urushadze et al., 2017
Vespertilionidae	Myotis blythii	Blood culture	67	cPCR	gltA	47.8	Georgia	KX300107; KX300112; KX300117; KX300123; KX300127; KX300131; KX300136; KX300140	8	8	Urushadze et al., 2017
Vespertilionidae	Myotis emarginatus	Blood culture	38	cPCR	gltA	39.5	Georgia	KX300145; KX300149; KX300154	3	3	Urushadze et al., 2017
Vespertilionidae	Pipistrellus pygmaeus	Blood culture	12	cPCR	gltA	16.7	Georgia	KX300179	1	1	Urushadze et al., 2017
Rhinolophidae	Rhinolophus euryale	Blood culture	26	cPCR	gltA	69.2	Georgia	KX300158	1	1	Urushadze et al., 2017
Rhinolophidae	Rhinolophus ferrumequinum	Blood culture	22	cPCR	gltA	45.5	Georgia	KY679155; KX300165; KX300169	3	3	Urushadze et al., 2017
	Total		79 isolates	MLST	gltA		Africa	KM030503-KM030526	22	22	Bai et al., 2015
Pteropodidae	Eidolon helvum		16	MLST	gltA		Kenya	KM030503-KM030511	8	8	Bai et al., 2015
Pteropodidae	Eidolon helvum		3	MLST	gltA		Cameroon	KM030518	1	1	Bai et al., 2015
Pteropodidae	Eidolon helvum		15	MLST	gltA		Tanzania	KM0305219-KM030525	6	6	Bai et al., 2015
Pteropodidae	Eidolon helvum		11	MLST	gltA		Nigeria	KM030512	1	1	Bai et al., 2015
Pteropodidae	Eidolon helvum			MLST	gltA		Ghana	KM030513-KM030517	5	5	Bai et al., 2015
Pteropodidae	Eidolon helvum		5	MLST	gltA		Uganda	KM030526	1	1	Bai et al., 2015
	Total	Blood	54	cPCR	gltA	-	Taiwan	JF500511-JF500514; JF500521;JF500522	2	2	Lin et al., 2012
Rhinolophidae	Rhinolophus monoceros	Blood	4	cPCR	gltA	-	Taiwan	-	-	-	Lin et al., 2012
Hipposideridae	Hipposideros terasensis	Blood	1	cPCR	gltA	-	Taiwan	-	-	-	Lin et al., 2012
Vespertilionidae	Pipistrellus abramus	Blood	35	cPCR	gltA	-	Taiwan	-	-	-	Lin et al., 2012
Miniopteridae	Miniopterus schreibersii	Blood	14	cPCR	gltA	42.9	Taiwan	JF500511-JF500514; JF500521;JF500522	4	4	Lin et al., 2012
	Total		-	MLST	gltA	-	Finland	KF003115; KF003137	2	2	Veikkolainen et al., 2014
Vespertilionidae	Eptesicus nilsonii	Blood	-	MLST	gltA	-	Finland	KF003115	1	1	Veikkolainen et al., 2014
Vespertilionidae	Myotis mystacinus	Siphonaptera sp.		MLST	gltA	-	Finland	KF003137	1	1	Veikkolainen et al., 2014
	Total	Pool (liver, spleen, lungs)	61	cPCR	gltA	4.9	Argentina	KX986615; KX986617	2	2	Cicuttin et al., 2017
Molossidae	Tadarida brasiliensis	Pool (liver, spleen, lungs)	61	cPCR	gltA	4.9	Argentina	KX986617	1	1	Cicuttin et al., 2017
	Total	Blood	92	cPCR	gltA	9.78	USA	KX807171-KX807179	9	9	Lilley et al., 2017
Vespertilionidae	Myotis lucifugus	Blood	73	cPCR	gltA	9.58	USA	KX807171-KX807174; KX807177-KX807179	7	7	Lilley et al., 2017
Vespertilionidae	Myotis grisescens	Blood	19	cPCR	gltA	10.52	USA	KX807175; KX807176	2	2	Lilley et al., 2017
	Total				gltA		Philippines	JX416239	1	1	Morse et al., 2012
					gltA		Puerto Rico	JX416245	1	1	Morse et al., 2012
					gltA		Puerto Rico	JX416242	1	1	Morse et al., 2012
					gltA		Panama	JX416251	1	1	Morse et al., 2012
					gltA		Dominican Republic	JX416249	1	1	Morse et al., 2012
					gltA		USA, Virgina	JX416236	1	1	Morse et al., 2012
					gltA		French Guyana	JX416232	1	1	Morse et al., 2012
					gltA		Puerto Rico	JX416230	1	1	Morse et al., 2012
					gltA		Panama	JX416254	1	1	Morse et al., 2012
					gltA		Dominican Republic	JX416237	1	1	Morse et al., 2012
					gltA		Malaysia	JX416256	1	1	Morse et al., 2012
					gltA		Malaysia	JX416257	1	1	Morse et al., 2012
					gltA		Malaysia	JX416238	1	1	Morse et al., 2012
					gltA		Dominican Republic	JX416250	1	1	Morse et al., 2012
					gltA		Dominican Republic	JX416253	1	1	Morse et al., 2012
	Total	Bat flies	137		gltA	66.4	Western Africa	JN172035-JN172074	39	39	Billeter et al., 2012
Pteropodidae	Eidolon helvum	Cyclopodia greefi greefi	46		gltA	56.5	Ghana	JN172035-JN172048	13	13	Billeter et al., 2012
Pteropodidae	Eidolon helvum	Cyclopodia greefi greefi	32		gltA	71.9	Annobon Island	JN172049-JN172057	8	8	Billeter et al., 2012
Pteropodidae	Eidolon helvum	Cyclopodia greefi greefi	59		gltA	71.2	Biko Isalnd	JN172058-JN172074	16	16	Billeter et al., 2012
	Total	Blood	124	cPCR	gltA	-	Finland	KR822802	1	1	Lilley et al., 2014
Vespertilionidae	Myotis daubentonii	Blood		cPCR	gltA	-	Finland	KR822802	1	1	Lilley et al., 2014
